# Supplementary material for: Structure-directing effects in (110)-layered hybrid perovskites containing two distinct organic moieties
Source: Royal Society of Chemistry journal article supplement (doi:10.1039/c9cc04964a), 2019-01-01
Supplement: c9cc04964a1.pdf [file c9cc04964a1.pdf]

## Structure-directing effects in (110)-layered hybrid perovskites containing two distinct organic moieties

Yuan-Yuan Guo<sup>a</sup>, Jason A. McNulty<sup>a</sup>, Natalie Mica<sup>b</sup>, Ifor D. W. Samuel<sup>b</sup>, Alexandra M. Z. Slawin<sup>a</sup>, Michael Bühl<sup>a</sup> and Philip Lightfoot\*<sup>a</sup>

a. School of Chemistry and EaStChem, University of St Andrews, St Andrews, Fife, KY16 9ST, UK.

b. Organic Semiconductor Centre, SUPA, School of Physics, University of St Andrews, St Andrews, Fife, KY16 9SS, U.K.

e-mail: [pl@st-andrews.ac.uk](mailto:pl@st-andrews.ac.uk)

### Supplementary Information

**Figure S1** Raw and calculated PXRD data for IGPbBr<sub>4</sub>

**Figure S2** Raw and calculated PXRD data for TGPbBr<sub>4</sub>

**Figure S3** Thermal Gravimetric Analysis (TGA) of IGPbBr<sub>4</sub> and TGPbBr<sub>4</sub>

**Figure S4** Crystal structure of TGPbBr<sub>4</sub> at room temperature.

**Figure S5** UV absorption spectra and Tauc plot (inset) of IGPbBr<sub>4</sub> at room temperature

**Figure S6** UV absorption spectra and Tauc plot (inset) of TGPbBr<sub>4</sub> at room temperature

**Figure S7** Photoluminescence spectra of IGPbBr<sub>4</sub> and TGPbBr<sub>4</sub>

**Figure S8** Ball and stick representation of the octahedra present in (a) IGPbBr<sub>4</sub> and (b) TGPbBr<sub>4</sub>

**Figure S9** Ion placed inside a cuboctahedron of 12 Ne atoms

**Table S1** Crystallographic data and refinement details

**Table S2** Selected bond lengths (Å) and bond angles (°) versus temperature for IGPbBr<sub>4</sub> and TGPbBr<sub>4</sub>

**Table S3** Hydrogen bond lengths (Å) and angles (°) for IGPbBr<sub>4</sub> at 93 K

**Table S4** Hydrogen bond lengths (Å) and angles (°) for IGPbBr<sub>4</sub> at 298 K

**Table S5** Hydrogen bond lengths (Å) and angles (°) for TGPbBr<sub>4</sub> at 93 K

**Table S6** Hydrogen bond lengths (Å) and angles (°) for TGPbBr<sub>4</sub> at 298 K

**Table S7** Calculated bond length distortions and bond angle variance for IGPbBr<sub>4</sub> and TGPbBr<sub>4</sub> at 93 and 298 K.

**Table S8** Computed molecular volumes and ionic radii

**Table S9** Computed molecular volumes obtained at different levels of theory.

## Synthesis

Lead (II) bromide ( $\text{PbBr}_2$ ,  $\geq 98\%$ ), hydrobromic acid (HBr, 48%, w/w aqueous solution), 1,2,4-triazole ( $\text{C}_2\text{H}_3\text{N}_3$ , 99%) and imidazole ( $\text{C}_3\text{H}_4\text{N}_2$ , 99%) were purchased from Alfa Aesar. Guanidinium carbonate ( $\text{C}_2\text{H}_{10}\text{N}_6\text{H}_2\text{CO}_3$ , 99%) and diethyl ether ( $(\text{C}_2\text{H}_5)_2\text{O}$ , 99.5%) were purchased from Sigma Aldrich. All chemicals were directly used without further purification.

The title compounds  $\text{IGPbBr}_4$  and  $\text{TGPbBr}_4$  were crystallized by a slow evaporation method.

For  $\text{IGPbBr}_4$  ( $\text{C}_4\text{H}_{11}\text{N}_5\text{PbBr}_4$ ), imidazole (204 mg, 3 mmol), guanidinium carbonate (180 mg, 1 mmol) and  $\text{PbBr}_2$  (734 mg, 2 mmol) were dissolved in conc. HBr (4 mL) with moderate heating. By cooling for a few hours, pale yellow, plate-shaped crystals were obtained. These were filtered and washed with diethyl ether (yield 54% based on  $\text{PbBr}_2$ ). Elemental analysis: (Anal. Calc. (%) for  $\text{IGPbBr}_4$ : C, 7.32; H, 1.69; N, 10.67. Found: C, 7.55; H, 1.54; N, 10.59).

For  $\text{TGPbBr}_4$  ( $\text{C}_3\text{H}_{10}\text{N}_6\text{PbBr}_4$ ), stoichiometric amounts of 1,2,4-triazole (138 mg, 2 mmol), guanidinium carbonate (180 mg, 1 mmol) and  $\text{PbBr}_2$  (734 mg, 2 mmol) were dissolved in conc. HBr (4 mL) with moderate heating. By cooling for a few hours, colourless, needle-shaped crystals were obtained. These were filtered and washed with diethyl ether (yield 43%). Elemental analysis: (Anal. Calc. (%) for  $\text{IGPbBr}_4$ : C, 5.48; H, 1.54; N, 12.79. Found: C, 5.51; H, 1.39; N, 12.75).

### Preliminary Characterisation

Powder X-ray diffraction data were collected on a PANalytical EMPYREAN diffractometer using Cu  $K_{\alpha 1}$  ( $\lambda = 1.5406 \text{ \AA}$ ) radiation to confirm the purity of each sample.

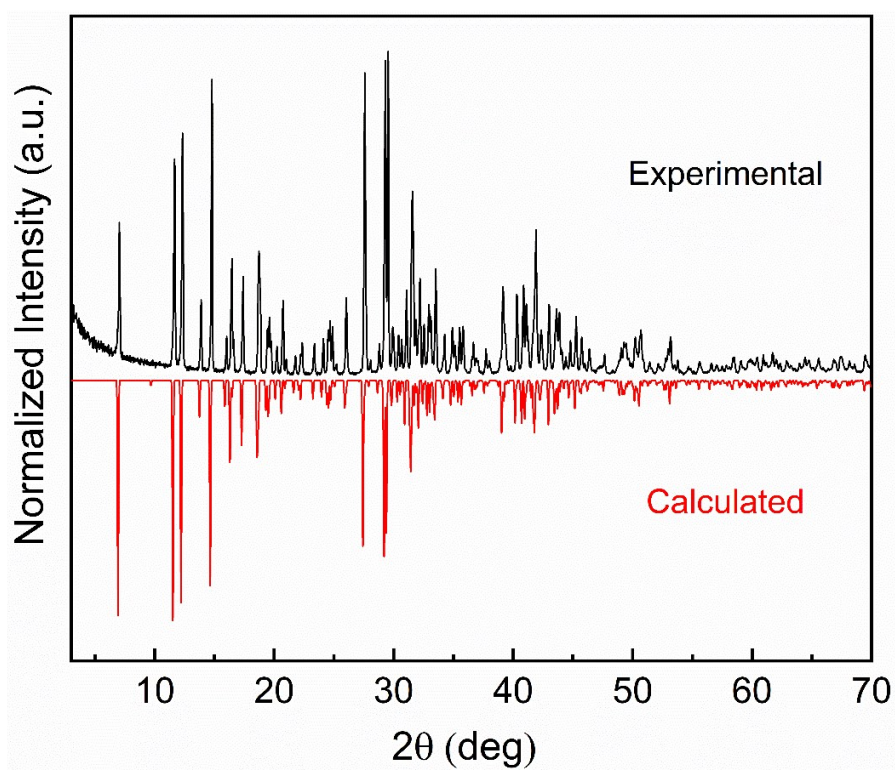

**Figure S1** Raw and calculated PXRd data for IGPbBr<sub>4</sub>

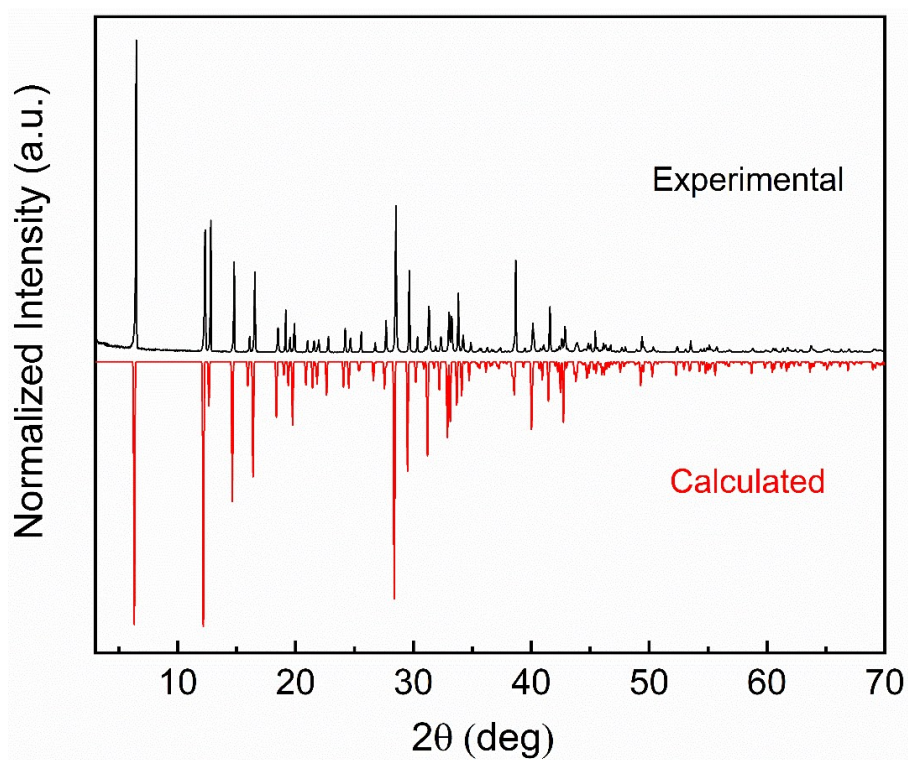

**Figure S2** Raw and calculated PXRd data for TGPbBr<sub>4</sub>

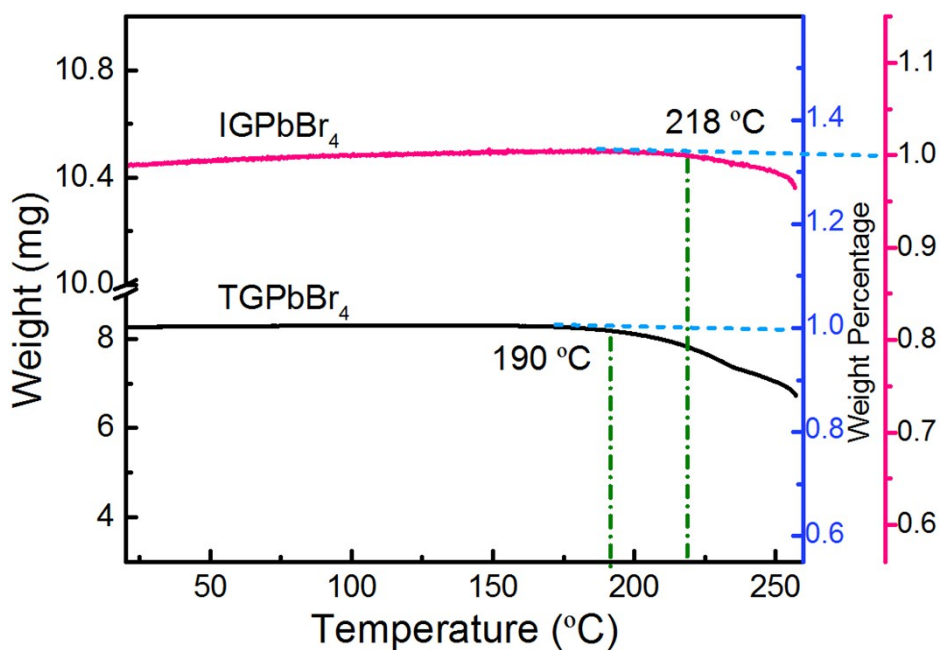

**Figure S3** Thermal Gravimetric Analysis (TGA) of IGpBr<sub>4</sub> and TGpBr<sub>4</sub>

Single Crystal data were collected at 93 and 298 K on a Rigaku XtaLAB P200 diffractometer and a Rigaku SCX Mini diffractometer using Mo-K<sub>α</sub> radiation. Data were collected using CrystalClear (Rigaku)<sup>3</sup>. Structures were solved by direct methods and refined using SHELX-2014<sup>4</sup> incorporated in the WINGX program<sup>5</sup>. Absorption corrections were performed semi-empirically from equivalent reflections on the basis of multi scans. Non-H atoms were refined anisotropically and hydrogen atoms were treated as riding atoms.

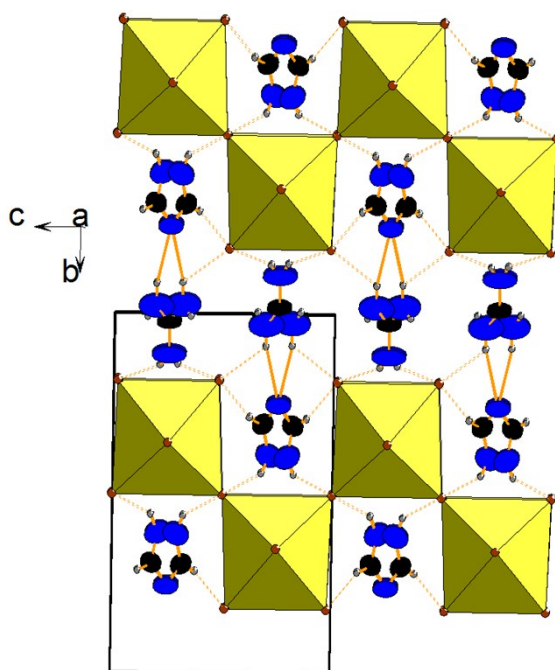

**Figure S4** Crystal structure of TGpBr<sub>4</sub> at 298 K, space group *P2/c*. Note that the TzH<sup>+</sup> moiety is disordered around the vertical two-fold axis, and there is no octahedral tilting

Solid UV-vis absorbance spectra were collected on a JASCO-V550 ultraviolet-visible spectrophotometer.

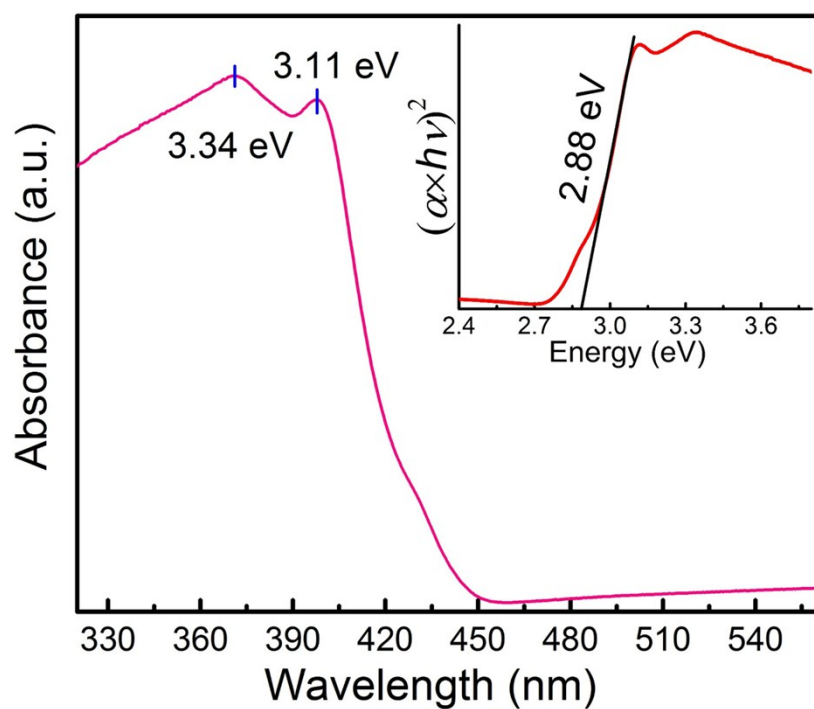

Figure S5 UV absorption spectra and Tauc plot<sup>6</sup> (inset) of IGpBr<sub>4</sub> at room temperature

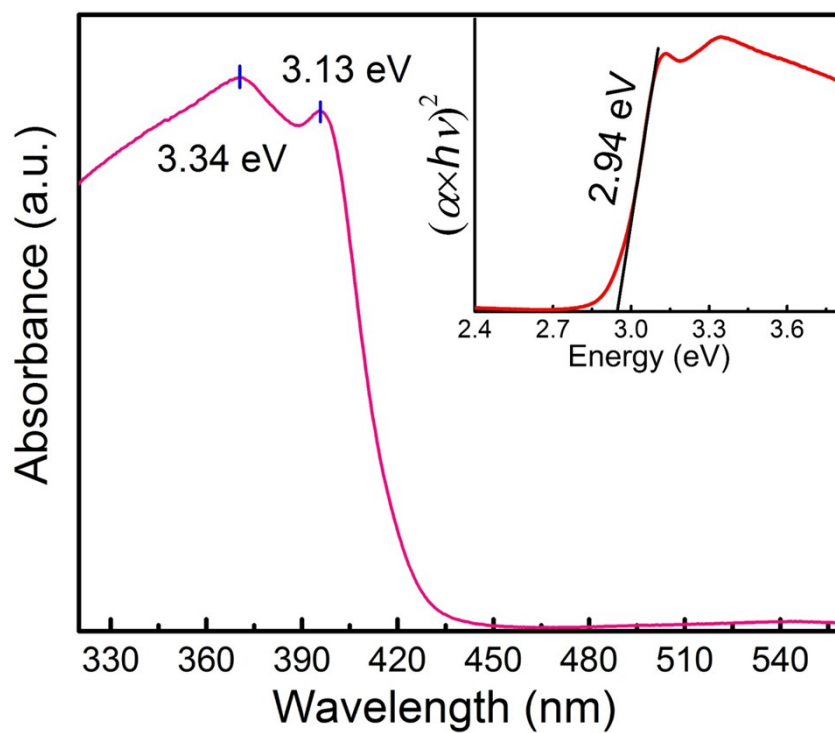

Figure S6 UV absorption spectra and Tauc plot (inset) of TGpBr<sub>4</sub> at room temperature

Photoluminescence spectra were recorded at room temperature using an Edinburgh Instrument FLS980 spectrometer.

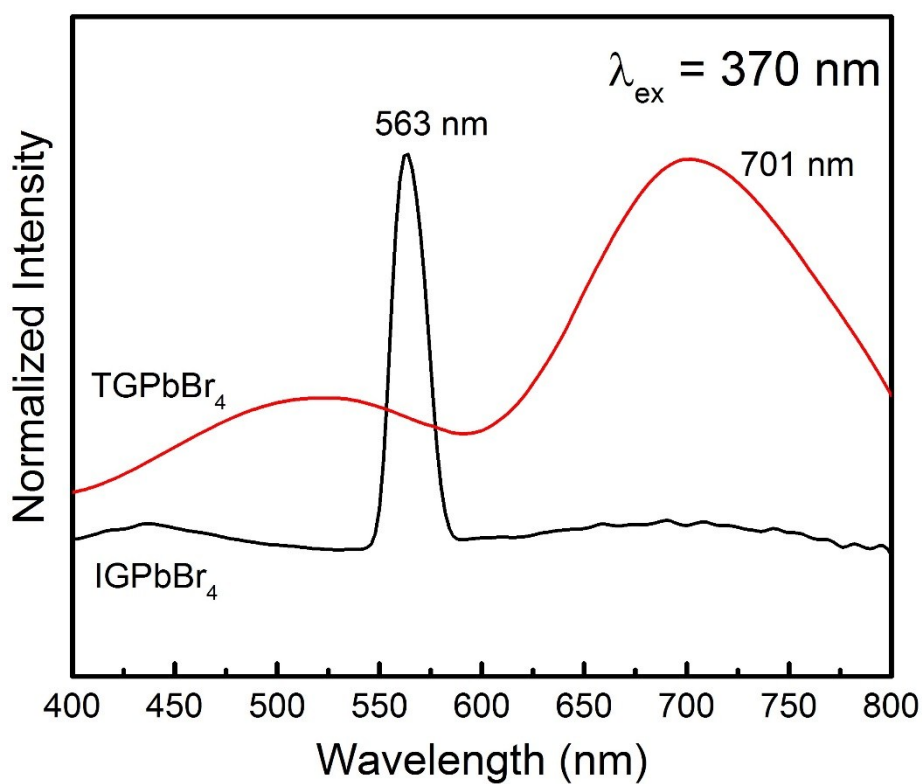

**Figure S7** Photoluminescence spectra of IGpBr<sub>4</sub> and TGpBr<sub>4</sub>

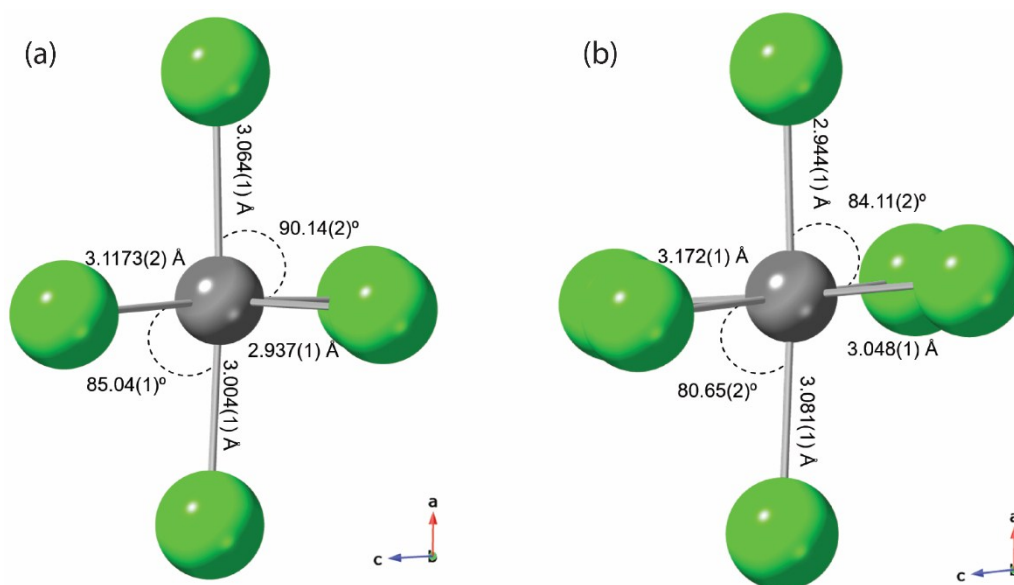

**Figure S8** Ball and stick representation of the octahedra present in (a) IGpBr<sub>4</sub> and (b) TGpBr<sub>4</sub> highlighting the greater degree of distortion in both the bond lengths and bond angles of the TGpBr<sub>4</sub> composition

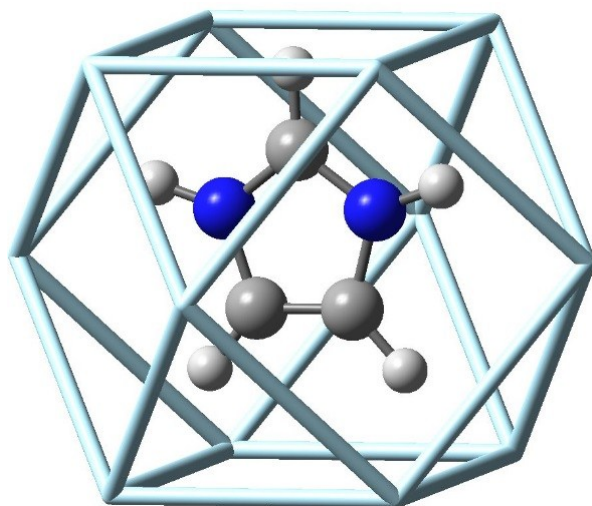

**Figure S9** Ion placed inside a cuboctahedron of 12 Ne atoms (at the vertices of the wireframe, atoms omitted for clarity), imidazolium shown as an example (colour code: grey, white and blue for C, H and N, respectively)

**Table S1** Crystallographic data and refinement details

|                                                     | IGPbBr <sub>4</sub>                                                                                   |                                                                                                       | TGPbBr <sub>4</sub>                                                                                   |                                                                                                       |
|-----------------------------------------------------|-------------------------------------------------------------------------------------------------------|-------------------------------------------------------------------------------------------------------|-------------------------------------------------------------------------------------------------------|-------------------------------------------------------------------------------------------------------|
| Temperature                                         | 93 K                                                                                                  | 298 K                                                                                                 | 93 K                                                                                                  | 298 K                                                                                                 |
| Formula                                             | (C <sub>3</sub> N <sub>2</sub> H <sub>5</sub> )(CN <sub>3</sub> H <sub>6</sub> )<br>PbBr <sub>4</sub> | (C <sub>3</sub> N <sub>2</sub> H <sub>5</sub> )(CN <sub>3</sub> H <sub>6</sub> )<br>PbBr <sub>4</sub> | (C <sub>2</sub> N <sub>3</sub> H <sub>4</sub> )(CN <sub>3</sub> H <sub>6</sub> )<br>PbBr <sub>4</sub> | (C <sub>2</sub> N <sub>3</sub> H <sub>4</sub> )(CN <sub>3</sub> H <sub>6</sub> )<br>PbBr <sub>4</sub> |
| Formula weight                                      | 656.01                                                                                                | 656.01                                                                                                | 657.00                                                                                                | 657.00                                                                                                |
| Crystal system                                      | Triclinic                                                                                             | Triclinic                                                                                             | Monoclinic                                                                                            | Monoclinic                                                                                            |
| Space group                                         | <i>P</i> -1                                                                                           | <i>P</i> -1                                                                                           | <i>P</i> 2 <sub>1</sub> / <i>c</i>                                                                    | <i>P</i> 2/ <i>c</i>                                                                                  |
| <i>a</i> /Å                                         | 6.0602(16)                                                                                            | 6.1106(4)                                                                                             | 6.003(2)                                                                                              | 6.0734(4)                                                                                             |
| <i>b</i> /Å                                         | 9.3286(2)                                                                                             | 9.2753(5)                                                                                             | 26.969(9)                                                                                             | 14.0000(9)                                                                                            |
| <i>c</i> /Å                                         | 12.8673(3)                                                                                            | 13.0429(9)                                                                                            | 8.613(3)                                                                                              | 8.5374(5)                                                                                             |
| <i>α</i> /°                                         | 95.127(2)                                                                                             | 93.474(9)                                                                                             | 90                                                                                                    | 90                                                                                                    |
| <i>β</i> /°                                         | 93.490(2)                                                                                             | 92.726(9)                                                                                             | 96.470(8)                                                                                             | 94.866(8)                                                                                             |
| <i>γ</i> /°                                         | 92.402(2)                                                                                             | 91.258(8)                                                                                             | 90                                                                                                    | 90                                                                                                    |
| <i>V</i> /Å <sup>3</sup>                            | 722.35(19)                                                                                            | 736.82(8)                                                                                             | 1385.5(8)                                                                                             | 723.30(8)                                                                                             |
| <i>Z</i>                                            | 2                                                                                                     | 2                                                                                                     | 4                                                                                                     | 2                                                                                                     |
| Measured ref                                        | 15685                                                                                                 | 6225                                                                                                  | 16723                                                                                                 | 6554                                                                                                  |
| Independent ref                                     | 2539                                                                                                  | 2580                                                                                                  | 2411                                                                                                  | 1428                                                                                                  |
|                                                     | [ <i>R</i> (int) = 0.0362]                                                                            | [ <i>R</i> (int) = 0.0831]                                                                            | [ <i>R</i> (int) = 0.0671]                                                                            | [ <i>R</i> (int) = 0.0471]                                                                            |
| GOOF                                                | 1.077                                                                                                 | 0.926                                                                                                 | 1.089                                                                                                 | 1.037                                                                                                 |
| Final <i>R</i> indices ( <i>I</i> > 2σ( <i>I</i> )) | <i>R</i> <sub>1</sub> = 0.0256<br>w <i>R</i> <sub>2</sub> = 0.0717                                    | <i>R</i> <sub>1</sub> = 0.0518<br>w <i>R</i> <sub>2</sub> = 0.1197                                    | <i>R</i> <sub>1</sub> = 0.0291<br>w <i>R</i> <sub>2</sub> = 0.0775                                    | <i>R</i> <sub>1</sub> = 0.0261<br>w <i>R</i> <sub>2</sub> = 0.0604                                    |



**Table S2** Selected bond lengths (Å) and bond angles (°) versus temperature for IGpBr<sub>4</sub> and TGpBr<sub>4</sub>

| Temperature     | IGpBr <sub>4</sub> |            | TGpBr <sub>4</sub> |            |
|-----------------|--------------------|------------|--------------------|------------|
|                 | 93 K               | 298 K      | 93 K               | 298 K      |
| <b>Pb-Br</b>    | 2.9238(6)          | 2.9108(19) | 2.8613(10)         | 2.9170(7)  |
|                 | 2.9367(6)          | 2.9330(17) | 2.9444(11)         | 2.9171(7)  |
|                 | 3.0035(9)          | 3.0357(15) | 2.9841(11)         | 3.0451(2)  |
|                 | 3.0635(10)         | 3.0757(15) | 3.0480(10)         | 3.0451(2)  |
|                 | 3.1358(2)          | 3.1403(6)  | 3.0809(12)         | 3.1191(2)  |
|                 | 3.1173(2)          | 3.1403(6)  | 3.1723(11)         | 3.1191(2)  |
| <b>Br-Pb-Br</b> | 84.632(11)         | 86.01(4)   | 80.645(19)         | 83.577(13) |
|                 | 85.036(12)         | 86.90(4)   | 84.11(2)           | 83.577(13) |
|                 | 85.327(12)         | 86.96(4)   | 84.12(3)           | 85.00(3)   |
|                 | 87.996(17)         | 88.22(5)   | 88.28(3)           | 86.359(8)  |
|                 | 89.564(12)         | 89.51(4)   | 89.09(2)           | 89.773(19) |
|                 | 89.625(16)         | 89.67(5)   | 89.99(2)           | 89.773(19) |
|                 | 89.816(13)         | 90.33(5)   | 90.38(2)           | 90.224(13) |
|                 | 90.138(16)         | 90.55(5)   | 91.33(3)           | 90.224(13) |
|                 | 91.482(16)         | 91.17(4)   | 92.47(2)           | 94.322(17) |
|                 | 93.905(16)         | 91.55(5)   | 94.24(2)           | 94.322(17) |
|                 | 96.222(11)         | 93.93(4)   | 96.26(3)           | 96.495(19) |
|                 | 96.478(6)          | 95.192(16) | 99.20(2)           | 96.495(19) |
| <b>Pb-Br-Pb</b> | 180.0              | 180.0      | 169.58(3)          | 180.0      |
|                 | 174.60(2)          | 178.08(7)  | 170.14(3)          | 171.51(3)  |

**Table S3** Hydrogen bond lengths (Å) and angles (°) for IGPbBr<sub>4</sub> at 93 K

| D-H...A            | d(D-H) | d(H...A) | d(D...A)  | <(DHA) |
|--------------------|--------|----------|-----------|--------|
| N4-H7...Br4        | 0.86   | 2.47     | 3.315(6)  | 168.5  |
| N5-H8...Br1#1      | 0.86   | 2.85     | 3.433(6)  | 126.8  |
| N5-H8...Br1 #5     | 0.86   | 2.80     | 3.442(6)  | 132.9  |
| C2-H9...Br1 #1     | 0.93   | 3.13     | 3.572(7)  | 111.4  |
| C2-H9...Br3 #1     | 0.93   | 2.85     | 3.580(7)  | 136.3  |
| C3-H10...Br4 #6    | 0.93   | 2.92     | 3.819(7)  | 161.9  |
| N1a-H1a...Br1 #7   | 0.86   | 2.64     | 3.481(7)  | 167.0  |
| N1a-H2a...Br4 #6   | 0.86   | 2.70     | 3.469(7)  | 149.1  |
| N2a-H3a...Br3 #7   | 0.86   | 2.75     | 3.527(8)  | 151.7  |
| N2a-H4a...Br5 #8   | 0.86   | 2.74     | 3.486(7)  | 146.3  |
| N3a-H5a...Br3 #6   | 0.86   | 2.74     | 3.499(8)  | 148.5  |
| N3a-H6a...Br2 #8   | 0.86   | 2.58     | 3.410(9)  | 163.7  |
| N1'b-H1'b...Br1 #7 | 0.86   | 2.71     | 3.46(2)   | 147.0  |
| N1'b-H2'b...Br3 #7 | 0.86   | 2.63     | 3.307(15) | 136.3  |
| N2'b-H4'b...Br2 #8 | 0.86   | 2.52     | 3.192(16) | 135.6  |
| N3'b-H5'b...Br4 #6 | 0.86   | 2.58     | 3.232(17) | 132.9  |
| N3'b-H6'b...Br3 #6 | 0.86   | 2.75     | 3.535(19) | 153.1  |

Symmetry transformations used to generate equivalent atoms:

#1 x-1,y,z #2 -x+1,-y,-z #3 x+1,y,z #4 -x+1,-y+1,-z

#5 -x,-y+1,-z+1 #6 -x+1,-y,-z+1 #7 -x+1,-y+1,-z+1

#8 x-1,y,z+1

**Table S4** Hydrogen bond lengths (Å) and angles (°) for IGPbBr<sub>4</sub> at 298 K

| D-H...A            | d(D-H) | d(H...A) | d(D...A)  | <(DHA) |
|--------------------|--------|----------|-----------|--------|
| N4-H7...Br4        | 0.86   | 2.54     | 3.370(16) | 161.9  |
| N5-H8...Br1#1      | 0.86   | 2.86     | 3.471(19) | 129.2  |
| N5-H8...Br1 #5     | 0.86   | 2.97     | 3.58(2)   | 130.1  |
| C2-H9...Br3 #1     | 0.93   | 2.87     | 3.61(2)   | 137.4  |
| C3-H10...Br4 #6    | 0.93   | 2.79     | 3.70(2)   | 164.3  |
| N1a-H1a...Br1 #7   | 0.86   | 2.76     | 3.59(2)   | 161.0  |
| N1a-H2a...Br4 #6   | 0.86   | 2.79     | 3.571(19) | 151.9  |
| N2a-H3a...Br5 #8   | 0.86   | 2.80     | 3.540(18) | 145.2  |
| N2a-H4a...Br3 #7   | 0.86   | 2.82     | 3.61(2)   | 154.4  |
| N3a-H5a...Br2 #8   | 0.86   | 2.71     | 3.51(2)   | 154.8  |
| N3a-H6a...Br3 #6   | 0.86   | 2.83     | 3.58(2)   | 146.8  |
| N1'b-H1'b...Br1 #7 | 0.86   | 2.63     | 3.44(5)   | 157.5  |
| N1'b-H2'b...Br3 #7 | 0.86   | 2.70     | 3.43(5)   | 144.4  |
| N2'b-H3'b...Br2 #8 | 0.86   | 2.66     | 3.31(5)   | 132.8  |
| N2'b-H4'b...Br5 #8 | 0.86   | 2.76     | 3.61(5)   | 168.7  |
| N3'b-H5'b...Br4 #6 | 0.86   | 2.59     | 3.30(5)   | 141.4  |
| N3'b-H6'b...Br3 #6 | 0.86   | 2.75     | 3.535(19) | 153.1  |

Symmetry transformations used to generate equivalent atoms:

#1 x-1,y,z #2 -x+1,-y,-z #3 x+1,y,z #4 -x+1,-y+1,-z

#5 -x,-y+1,-z+1 #6 -x+1,-y,-z+1 #7 -x+1,-y+1,-z+1

#8 x-1,y,z+1

**Table S5** Hydrogen bond lengths (Å) and angles (°) for TGPbBr<sub>4</sub> at 93 K

| D-H...A         | d(D-H) | d(H...A) | d(D...A) | <(DHA) |
|-----------------|--------|----------|----------|--------|
| N1-H1...Br2 #5  | 0.86   | 2.65     | 3.474(6) | 161.0  |
| N1-H2...Br4 #6  | 0.86   | 2.91     | 3.692(6) | 152.4  |
| N2-H3...Br4 #6  | 0.86   | 2.73     | 3.548(7) | 160.0  |
| N2-H4...Br4 #1  | 0.86   | 2.72     | 3.461(6) | 145.0  |
| N3-H5...Br2 #7  | 0.86   | 2.92     | 3.376(6) | 114.7  |
| N3-H5...Br2 #5  | 0.86   | 3.10     | 3.829(6) | 143.7  |
| N3-H6...N6      | 0.86   | 2.21     | 3.014(9) | 155.6  |
| N4-H7...Br1 #8  | 0.86   | 2.99     | 3.509(7) | 120.7  |
| N4-H7...Br3 #9  | 0.86   | 2.70     | 3.388(6) | 137.9  |
| N5-H8...Br4     | 0.86   | 2.39     | 3.240(6) | 169.1  |
| C2-H9...Br1 #8  | 0.93   | 3.07     | 3.551(8) | 114.2  |
| C2-H9...Br3 #2  | 0.93   | 2.95     | 3.735(8) | 143.5  |
| C3-H10...Br2 #9 | 0.93   | 2.77     | 3.657(8) | 159.4  |

Symmetry transformations used to generate equivalent atoms:

#1  $x+1,y,z$  #2  $x,-y+1/2,z-1/2$  #3  $x-1,y,z$  #4  $x,-y+1/2,z+1/2$

#5  $-x+1,-y+1,-z+1$  #6  $-x+2,-y+1,-z+1$  #7  $x,y,z-1$

#8  $x+1,-y+1/2,z-1/2$  #9  $x+1,y,z-1$

**Table S6** Hydrogen bond lengths (Å) and angles (°) for TGPbBr<sub>4</sub> at 298 K

| D-H...A          | d(D-H) | d(H...A) | d(D...A)  | <(DHA) |
|------------------|--------|----------|-----------|--------|
| N1-H1...Br2      | 0.86   | 2.80     | 3.625(3)  | 160.1  |
| N1-H2...Br2 #3   | 0.86   | 2.80     | 3.625(3)  | 160.1  |
| N2-H3...Br2      | 0.86   | 2.99     | 3.770(10) | 151.0  |
| N2-H4...Br2 #7   | 0.86   | 2.91     | 3.401(8)  | 118.0  |
| N2-H4...N3 #8    | 0.86   | 2.51     | 3.305(12) | 153.5  |
| N4-H5...Br1 #9   | 0.86   | 3.06     | 3.595(7)  | 122.1  |
| N4-H5...Br3 #1   | 0.86   | 2.83     | 3.553(6)  | 142.4  |
| C-N4-H5...Br1 #9 | 0.86   | 3.06     | 3.595(7)  | 122.1  |
| C-N4-H5...Br3 #1 | 0.86   | 2.83     | 3.553(6)  | 142.4  |
| C2-H8...Br2      | 0.86   | 2.58     | 3.409(7)  | 161.2  |
| N-C2-H8...Br2    | 0.86   | 2.58     | 3.409(7)  | 161.2  |

Symmetry transformations used to generate equivalent atoms:

#1 -x+1,y,-z+1/2 #2 x+1,y,z #3 -x,y,-z+1/2

#4 -x,y,-z+3/2 #5 x-1,y,z #6 -x+1,-y+1,-z

#7 -x+1,-y+2,-z+1 #8 -x,-y+2,-z+1 #9 -x,-y+1,-z+1

The bond length distortion of the  $\text{PbBr}_6$  octahedra in each composition at both 93 and 298 K was calculated using eq. 1<sup>7</sup>, where  $d$  is the average Pb-Br bond distance and  $d_n$  are the six individual bond distances. The bond angle variance of each octahedron from the ideal  $90^\circ$  of an undistorted structure was calculated using eq. 2<sup>8</sup>, where  $\theta_i$  is the individual Br-Pb-Br angle.

$$\Delta d = \left(\frac{1}{6}\right) \sum \left[ \frac{d_n - d}{d} \right]^2 \quad (1)$$

$$\sigma^2 = \sum_{i=1}^{12} \frac{(\theta_i - 90)^2}{11} \quad (2)$$

**Table S7** Calculated bond length distortions and bond angle variance for  $\text{IGPbBr}_4$  and  $\text{TGPbBr}_4$  at 93 and 298 K

| Temperature                       | $\Delta d (\times 10^{-4})$ | $\sigma^2$ |
|-----------------------------------|-----------------------------|------------|
| <b>IGPbBr<sub>4</sub> (93 K)</b>  | 7.39                        | 16.16      |
| <b>IGPbBr<sub>4</sub> (298 K)</b> | 8.91                        | 7.71       |
| <b>TGPbBr<sub>4</sub> (93 K)</b>  | 10.97                       | 28.22      |
| <b>TGPbBr<sub>4</sub> (298 K)</b> | 7.59                        | 22.06      |

## Computational Study

For comparison with the previously estimated empirical effective radii, molecular volumes were first calculated (Method 1) from quantum-chemical calculations (B3LYP-D3 level), obtained from integration over the total electron densities. The resulting radii, given in Table 1, were then calculated for spheres with the same volumes. Arguably for most molecular cations, especially for the “planar” ones considered here, the approximation of the molecule as a sphere may not be very accurate. For an alternative modelling of the coordination environment (Method 2), we chose to optimise the cation within an idealised  $\text{Ne}_{12}$  cuboctahedron (to mimic the 12-fold coordination of the ideal perovskite A-site by closed-shell anions) with the ions encapsulated (see Figure S11 for an example) and used the resulting optimised Ne-Ne distances ( $d_{\text{opt}}$ , see Table S8) to calculate the ionic radii in Table 1.

**Table S8** Molecular volumes and ionic radii computed at the B3LYP-D3/6-31+G(d,p) level

| Cation <sup>i</sup> | $V$ [ $\text{\AA}^3$ ] | $r_{\text{calc}}$ [pm] <sup>ii</sup> | $d_{\text{opt}}$ [pm] <sup>iii</sup> | $r'_{\text{calc}}$ [pm] <sup>iii</sup> |
|---------------------|------------------------|--------------------------------------|--------------------------------------|----------------------------------------|
| $\text{NH}_4^+$     | 30.46                  | 193.7                                | 310.4                                | 176.8                                  |
| $\text{MAH}^+$      | 54.25                  | 234.8                                | 306.7                                | 227.1                                  |
| $\text{FAH}^+$      | 63.13                  | 247.0                                | 379.0                                | 245.4                                  |
| $\text{HAH}^+$      | 48.26                  | 225.9                                | 346.4                                | 212.8                                  |
| $\text{AZH}^+$      | 88.44                  | 276.4                                | 405.3                                | 271.7                                  |
| $\text{HYH}^+$      | 42.63                  | 216.7                                | 335.2                                | 201.6                                  |
| $\text{EAH}^+$      | 77.88                  | 264.9                                | 395.2                                | 261.6                                  |
| $\text{DMH}^+$      | 77.92                  | 265.0                                | 397.1                                | 263.4                                  |
| $\text{TMH}^+$      | 124.1                  | 309.4                                | 440.3                                | 306.7                                  |
| $\text{ImH}^+$      | 85.82                  | 273.6                                | 406.4                                | 272.8                                  |
| $\text{GuH}^+$      | 79.27                  | 266.4                                | 405.2                                | 271.6                                  |
| $\text{TzH}^+$      | 80.41                  | 267.8                                | 402.8                                | 269.2                                  |

i.  $\text{MaH}^+$  = methylammonium;  $\text{FAH}^+$  = formamidineium;  $\text{HAH}^+$  = hydrazinium;  $\text{AZH}^+$  = azetidinium;  $\text{HYH}^+$  = hydroxylammonium;  $\text{EAH}^+$  = ethylammonium;  $\text{DMH}^+$  = dimethylammonium;  $\text{TMH}^+$  = tetramethylammonium.

ii. Calculated for a sphere with volume  $V$  (Method 1).

iii. From optimisations inside a  $\text{Ne}_{12}$  cuboctahedron (Method 2).

Geometries for isolated cations were fully optimized at the B3LYP-D3/6-31G+(d,p) level<sup>9,10</sup> of density functional theory (DFT), including Grimme's empirical dispersion<sup>10</sup> correction with Becke-Johnson damping,<sup>11</sup> together with a fine integration grid (75 radial shells with 302 angular points per shell). The

nature of the minima was verified by computations of the harmonic frequencies at the same level of theory. Molecular volumes  $V$  were computed from a Monte Carlo integration of the volume inside an isodensity surface ( $\rho = 0.001$  electrons/Bohr<sup>3</sup>) and a dense grid for evaluating the density ( $10^6$  points per Bohr<sup>3</sup>). The ionic radius  $r_{\text{calc}}$  was then evaluated for a sphere with the same volume,  $V$ . In addition, B3LYP-D3/6-31G+(d,p) optimisations were performed for the ions placed inside a cuboctahedron of 12 neon atoms, constrained at ideal atomic positions corresponding to  $O_h$  symmetry. Besides the single degree of freedom for the constrained Ne<sub>12</sub> cluster (the Ne-Ne distance), all atomic degrees of freedom of the ions were optimised without constraints. The ionic radius  $r'_{\text{calc}}$  was then obtained from the optimised Ne-Ne distances  $d_{\text{opt}}$  via

$$r'_{\text{calc}} = d_{\text{opt}} - \frac{1}{2}d_0 \quad (3)$$

where  $d_0$  was taken as the Ne-Ne distance from a fully optimised Ne<sub>12</sub> cluster with a proton at the centre (267.2 pm,  $O_h$  symmetry imposed).

To probe for the dependence of the molecular volume on the level of theory, the calculations for dimethylammonium ion, NH<sub>2</sub>Me<sub>2</sub><sup>+</sup>, were repeated with a few other selected method/basis-set combinations (see Table S9). All resulting radii were within 2.5 pm of each other, indicating that the B3LYP-D3/6-31+G(d,p) values used for the other ions should be qualitatively reliable.

**Table S9:** Computed molecular volume  $V$  and resulting radius  $r_{\text{calc}}$  of dimethylammonium, NH<sub>2</sub>Me<sub>2</sub><sup>+</sup>, obtained at different levels of theory

| Method / basis set                   | $V$ [Å <sup>3</sup> ] | $r_{\text{calc}}$ [pm] <sup>a</sup> |
|--------------------------------------|-----------------------|-------------------------------------|
| B3LYP/6-31+G(d,p)                    | 77.94                 | 265.0                               |
| B3LYP-D3/6-31+G(d,p)                 | 77.92                 | 265.0                               |
| B3LYP-D3/aug-cc-pVDZ <sup>12</sup>   | 77.56                 | 264.5                               |
| B3LYP-D3/aug-cc-pVTZ <sup>12</sup>   | 75.86                 | 262.6                               |
| PBE <sup>13,14</sup> -D3/6-31+G(d,p) | 77.51                 | 264.5                               |
| PBE <sup>13</sup> -D3/6-31+G(d,p)    | 78.22                 | 265.3                               |
| M06-2X <sup>15</sup> /6-31+G(d,p)    | 77.50                 | 264.5                               |
| MP2/6-31+G(d,p)                      | 78.04                 | 265.1                               |
| MP2/cc-pVTZ                          | 77.46                 | 264.4                               |

<sup>a</sup>Calculated for a sphere with volume  $V$ .

All computations were performed using the Gaussian09 suite of programs.<sup>16</sup>



## References

- 1 A. C. Larson and R. B. Von Dreele, *General Structure Analysis System (GSAS)*, 2004.
- 2 B. H. Toby, *J. Appl. Crystallogr.*, 2001, **34**, 210.
- 3 Rigaku, 2014, *CrystalClear*, Rigaku Corporation, Tokyo, Japan.
- 4 G. M. Sheldrick, *Acta Crystallogr. Sect. C: Struct. Chem.*, 2015, **71**, 3.
- 5 L. J. Farrugia, *J. Appl. Crystallogr.*, 2012, **45**, 849.
- 6 J. Tauc, *Mater. Res. Bull.*, 1968, **3**, 37.
- 7 M. W. Lufaso and P. M. Woodward, *Acta Crystallogr. Sect. B: Struct. Sci.*, 2004, **60**, 10.
- 8 K. Robinson, G. V. Gibbs and P. H. Ribbe, *Science*, 1971, **172**, 567.
- 9 a) A. D. Becke, *J. Chem. Phys.* 1993, **98**, 5648; b) C. Lee, W. Yang, R. G. Parr, *Phys. Rev. B* 1988, **37**, 785.
- 10 a) S. Grimme, J. Antony, S. Ehrlich, H. Krieg, *J. Chem. Phys.* 2010, **132**, 154104. b) S. Grimme, S. Ehrlich, L. Goerigk, *J. Comput. Chem.* 2011, **32**, 1456. c) T. Risthaus, S. Grimme, *J. Chem. Theory Comput.* 2013, **9**, 1580.
- 11 a) A. D. Becke, E. R. Johnson, *J. Chem. Phys.* 2005, **122**, 154104. b) E. R. Johnson, A. D. Becke, *J. Chem. Phys.* 2006, **124**, 174104.
- 12 a) T. H. Dunning Jr., *J. Chem. Phys.* 1989, **90**, 1007; b) R. A. Kendall, T. H. Dunning Jr., R. J. Harrison, *J. Chem. Phys.* 1992, **96**, 6796; c) D. E. Woon, T. H. Dunning Jr., *J. Chem. Phys.* 1993, **98**, 1358.
- 13 a) J. P. Perdew, In *Electronic Structure of Solids*, Ziesche, P.; Eischrig, H. Eds.: Akademie Verlag: Berlin (1991); b) J. P. Perdew, Y. Wang, *Phys. Rev. B* 1992, **45**, 13244.
- 14 a) J. P. Perdew, M. Ernzerhof, K. Burke, *J. Phys. Chem.* 1996, **105**, 9982; b) C. Adamo, V. Barone, *J. Chem. Phys.* 1999, **110**, 6158.
- 15 Y. Zhao, D. G. Truhlar, *Theor. Chem. Acc.* 2008, **120**, 215.
- 16 M. J. Frisch, G. W. Trucks, H. B. Schlegel, G. E. Scuseria, M. A. Robb, J. R. Cheeseman, G. Scalmani, V. Barone, B. Mennucci, G. A. Petersson, H. Nakatsuji, M. Caricato, X. Li, H. P. Hratchian, A. F. Izmaylov, J. Bloino, G. Zheng, J. L. Sonnenberg, M. Hada, M. Ehara, K. Toyota, R. Fukuda, J. Hasegawa, M. Ishida, T. Nakajima, Y. Honda, O. Kitao, H. Nakai, T. Vreven, J. Montgomery, J. A., J. E. Peralta, F. Ogliaro, M. Bearpark, J. J. Heyd, E. Brothers, K. N. Kudin, V. N. Staroverov, R. Kobayashi, J. Normand, K. Raghavachari, A. Rendell, J. C. Burant, S. S. Iyengar, J. Tomasi, M. Cossi, N. Rega, N. J. Millam, M. Klene, J. E. Knox, J. B. Cross, V. Bakken, C. Adamo, J. Jaramillo, R. Gomperts, R. E. Stratmann, O. Yazyev, A. J. Austin, R. Cammi, C. Pomelli, J. W. Ochterski, R. L. Martin, K. Morokuma, V. G. Zakrzewski, G. A. Voth, P. Salvador, J. J. Dannenberg, S. Dapprich, A. D. Daniels, Ö. Farkas, J. B. Foresman, J. V. Ortiz, J. Cioslowski, D. J. Fox, *Gaussian 09, Rev. D.01*, Wallingford CT, 2013.

## Cartesian coordinates (in Å, B3LYP-D3 optimised)

### H+@Ne12

|    |           |           |           |
|----|-----------|-----------|-----------|
| Ne | 0.000000  | -1.889700 | 1.889700  |
| Ne | 0.000000  | 1.889700  | 1.889700  |
| Ne | 0.000000  | 1.889700  | -1.889700 |
| Ne | 0.000000  | -1.889700 | -1.889700 |
| Ne | 1.889700  | 0.000000  | 1.889700  |
| Ne | 1.889700  | 1.889700  | 0.000000  |
| Ne | 1.889700  | 0.000000  | -1.889700 |
| Ne | 1.889700  | -1.889700 | 0.000000  |
| Ne | -1.889700 | 0.000000  | 1.889700  |
| Ne | -1.889700 | 1.889700  | 0.000000  |
| Ne | -1.889700 | 0.000000  | -1.889700 |
| Ne | -1.889700 | -1.889700 | 0.000000  |
| H  | 0.000000  | 0.000000  | 0.000000  |

### NH4+

|   |           |           |           |
|---|-----------|-----------|-----------|
| N | 0.000000  | 0.000000  | 0.000000  |
| H | 0.592773  | 0.592773  | 0.592773  |
| H | -0.592773 | -0.592773 | 0.592773  |
| H | -0.592773 | 0.592773  | -0.592773 |
| H | 0.592773  | -0.592773 | -0.592773 |

### NH4+@Ne12

|    |           |           |           |
|----|-----------|-----------|-----------|
| Ne | 0.013105  | 2.265604  | 2.122293  |
| Ne | 0.062067  | -2.122149 | 2.265070  |
| Ne | -0.013079 | -2.265751 | -2.122286 |
| Ne | -0.062041 | 2.122002  | -2.265063 |
| Ne | -2.157130 | 0.048485  | 2.232033  |
| Ne | -2.170222 | -2.217193 | 0.109743  |
| Ne | -2.232276 | -0.095117 | -2.155323 |
| Ne | -2.219184 | 2.170560  | -0.033033 |
| Ne | 2.232302  | 0.094970  | 2.155330  |
| Ne | 2.219210  | -2.170708 | 0.033040  |
| Ne | 2.157156  | -0.048632 | -2.232026 |
| Ne | 2.170248  | 2.217046  | -0.109736 |
| N  | -0.000163 | 0.000752  | -0.000085 |
| H  | -0.602043 | 0.830596  | -0.034984 |
| H  | -0.583828 | -0.840504 | 0.056566  |
| H  | 0.577958  | -0.039192 | -0.846161 |
| H  | 0.607482  | 0.052671  | 0.824729  |

### NH3Me+

|   |           |           |           |
|---|-----------|-----------|-----------|
| N | 0.000000  | 0.000000  | 0.712569  |
| C | 0.000000  | 0.000000  | -0.803803 |
| H | 0.000000  | 0.954555  | 1.089224  |
| H | -0.826669 | -0.477278 | 1.089224  |
| H | 0.826669  | -0.477278 | 1.089224  |
| H | 0.000000  | -1.034670 | -1.144279 |
| H | -0.896051 | 0.517335  | -1.144279 |
| H | 0.896051  | 0.517335  | -1.144279 |

### NH3Me+@Ne12

|    |           |           |           |
|----|-----------|-----------|-----------|
| Ne | 3.607248  | 0.000000  | 0.000000  |
| Ne | 0.000000  | -3.607248 | 0.000000  |
| Ne | -3.607248 | 0.000000  | 0.000000  |
| Ne | 0.000000  | 3.607248  | 0.000000  |
| Ne | 1.803624  | -1.803624 | 2.550709  |
| Ne | -1.803624 | -1.803624 | 2.550709  |
| Ne | -1.803624 | 1.803624  | 2.550709  |
| Ne | 1.803624  | 1.803624  | 2.550709  |
| Ne | 1.803624  | -1.803624 | -2.550709 |
| Ne | -1.803624 | -1.803624 | -2.550709 |
| Ne | -1.803624 | 1.803624  | -2.550709 |
| Ne | 1.803624  | 1.803624  | -2.550709 |
| N  | -0.460630 | 0.457777  | 0.506152  |
| C  | 0.267610  | -0.268597 | -0.598733 |
| H  | -0.301598 | 1.470042  | 0.458176  |
| H  | -1.473051 | 0.302624  | 0.453015  |
| H  | -0.148552 | 0.140784  | 1.429733  |
| H  | 0.066213  | -1.331801 | -0.495611 |
| H  | -0.102234 | 0.102355  | -1.552104 |
| H  | 1.330609  | -0.067109 | -0.493785 |

### CH (NH2) 2+

|   |           |           |           |
|---|-----------|-----------|-----------|
| C | 0.000000  | 0.000000  | 0.429127  |
| H | 0.000000  | 0.000000  | 1.515793  |
| N | 0.000000  | 1.166785  | -0.175772 |
| N | 0.000000  | -1.166785 | -0.175772 |
| H | 0.000391  | 2.019690  | 0.370337  |
| H | -0.000391 | -2.019690 | 0.370337  |
| H | 0.000209  | 1.268494  | -1.185212 |
| H | -0.000209 | -1.268494 | -1.185212 |

### CH (NH2) 2+@Ne12

|    |           |           |           |
|----|-----------|-----------|-----------|
| Ne | 3.790043  | 0.000000  | 0.000000  |
| Ne | 0.000000  | -3.790043 | 0.000000  |
| Ne | -3.790043 | 0.000000  | 0.000000  |
| Ne | 0.000000  | 3.790043  | 0.000000  |
| Ne | 1.895022  | -1.895022 | 2.679965  |
| Ne | -1.895022 | -1.895022 | -2.679965 |
| Ne | -1.895022 | 1.895022  | 2.679965  |
| Ne | 1.895022  | 1.895022  | 2.679965  |
| Ne | 1.895022  | -1.895022 | -2.679965 |
| Ne | -1.895022 | -1.895022 | -2.679965 |
| Ne | -1.895022 | 1.895022  | -2.679965 |
| Ne | 1.895022  | 1.895022  | -2.679965 |
| C  | -0.426288 | 0.427795  | 0.002567  |
| H  | -1.193545 | 1.196267  | 0.002815  |
| N  | 0.826154  | 0.821324  | 0.004555  |
| N  | -0.821801 | -0.824027 | 0.000476  |
| H  | 1.042011  | 1.809693  | 0.005542  |
| H  | -1.810511 | -1.038157 | -0.001962 |
| H  | 1.610354  | 0.178822  | 0.001837  |
| H  | -0.180573 | -1.609243 | 0.000659  |

### N2H5+

|   |           |           |           |
|---|-----------|-----------|-----------|
| N | -0.045023 | -0.661353 | 0.000000  |
| N | -0.045023 | 0.786102  | 0.000000  |
| H | 0.877781  | -1.124386 | 0.000000  |
| H | -0.571319 | -0.981919 | 0.822757  |
| H | -0.571319 | -0.981919 | -0.822757 |
| H | 0.447589  | 1.107491  | 0.832811  |
| H | 0.447589  | 1.107491  | -0.832811 |

### N2H5+@Ne12

|    |           |           |           |
|----|-----------|-----------|-----------|
| Ne | 3.463806  | 0.000000  | 0.000000  |
| Ne | 0.000000  | -3.463806 | 0.000000  |
| Ne | -3.463806 | 0.000000  | 0.000000  |
| Ne | 0.000000  | 3.463806  | 0.000000  |
| Ne | 1.731903  | -1.731903 | 2.449281  |
| Ne | -1.731903 | -1.731903 | 2.449281  |
| Ne | -1.731903 | 1.731903  | 2.449281  |
| Ne | 1.731903  | 1.731903  | 2.449281  |
| Ne | 1.731903  | -1.731903 | -2.449281 |
| Ne | -1.731903 | -1.731903 | -2.449281 |
| Ne | -1.731903 | 1.731903  | -2.449281 |
| Ne | 1.731903  | 1.731903  | -2.449281 |
| N  | -0.033173 | -0.712046 | 0.003140  |
| N  | -0.104918 | 0.729270  | -0.001517 |
| H  | 0.912329  | -1.122905 | 0.015118  |
| H  | -0.549052 | -1.057940 | 0.821320  |
| H  | -0.530516 | -1.062317 | -0.824585 |
| H  | 0.365788  | 1.072610  | 0.833628  |
| H  | 0.387464  | 1.068368  | -0.825858 |

### cyclo-(CH2) 3 (NH2) +

|   |           |           |           |
|---|-----------|-----------|-----------|
| C | -0.095567 | -0.024387 | 1.078847  |
| C | -0.095567 | -0.024387 | -1.078847 |
| C | -0.095567 | -1.129548 | 0.000000  |
| N | 0.252297  | 1.017777  | 0.000000  |
| H | -1.076997 | 0.213429  | 1.488919  |
| H | -1.076997 | 0.213429  | -1.488919 |
| H | 0.818152  | -1.725993 | 0.000000  |
| H | 1.242842  | 1.274518  | 0.000000  |
| H | 0.651144  | -0.059473 | 1.871085  |
| H | 0.651144  | -0.059473 | -1.871085 |

|   |           |           |          |
|---|-----------|-----------|----------|
| H | -0.959461 | -1.793105 | 0.000000 |
| H | -0.295701 | 1.882167  | 0.000000 |

cyclo-(CH2)3(NH2)+@Ne12

|    |           |           |           |
|----|-----------|-----------|-----------|
| Ne | 4.053149  | 0.000000  | 0.000000  |
| Ne | 0.000000  | -4.053149 | 0.000000  |
| Ne | -4.053149 | 0.000000  | 0.000000  |
| Ne | 0.000000  | 4.053149  | 0.000000  |
| Ne | 2.026574  | -2.026574 | 2.866009  |
| Ne | -2.026574 | -2.026574 | 2.866009  |
| Ne | -2.026574 | 2.026574  | 2.866009  |
| Ne | 2.026574  | 2.026574  | 2.866009  |
| Ne | 2.026574  | -2.026574 | -2.866009 |
| Ne | -2.026574 | -2.026574 | -2.866009 |
| Ne | -2.026574 | 2.026574  | -2.866009 |
| Ne | 2.026574  | 2.026574  | -2.866009 |
| C  | 0.124765  | 0.224626  | 1.076920  |
| C  | 0.122007  | 0.223461  | -1.078055 |
| C  | -0.510415 | -0.680136 | 0.000726  |
| N  | 0.995089  | 0.890387  | -0.002040 |
| H  | -0.542693 | 0.974556  | 1.495504  |
| H  | -0.546515 | 0.972944  | -1.495623 |
| H  | -0.104452 | -1.691070 | 0.000766  |
| H  | 1.960311  | 0.552943  | -0.003087 |
| H  | 0.724043  | -0.232824 | 1.861093  |
| H  | 0.719218  | -0.234793 | -1.863347 |
| H  | -1.598236 | -0.727321 | 0.002114  |
| H  | 1.017684  | 1.913023  | -0.002637 |

NH3OH+

|   |           |           |           |
|---|-----------|-----------|-----------|
| N | 0.042868  | -0.628089 | 0.000000  |
| O | 0.042868  | 0.780217  | 0.000000  |
| H | 1.040013  | -0.885953 | 0.000000  |
| H | -0.396723 | -1.017599 | 0.848253  |
| H | -0.396723 | -1.017599 | -0.848253 |
| H | -0.889596 | 1.076042  | 0.000000  |

NH3OH+@Ne12

|    |           |           |           |
|----|-----------|-----------|-----------|
| Ne | 3.352029  | 0.000000  | 0.000000  |
| Ne | 0.000000  | -3.352029 | 0.000000  |
| Ne | -3.352029 | 0.000000  | 0.000000  |
| Ne | 0.000000  | 3.352029  | 0.000000  |
| Ne | 1.676015  | -1.676015 | 2.370242  |
| Ne | -1.676015 | -1.676015 | 2.370242  |
| Ne | -1.676015 | 1.676015  | 2.370242  |
| Ne | 1.676015  | 1.676015  | 2.370242  |
| Ne | 1.676015  | -1.676015 | -2.370242 |
| Ne | -1.676015 | -1.676015 | -2.370242 |
| Ne | -1.676015 | 1.676015  | -2.370242 |
| Ne | 1.676015  | 1.676015  | -2.370242 |
| N  | -0.064506 | -0.625666 | -0.005170 |
| O  | 0.003000  | 0.774570  | 0.073092  |
| H  | 0.464813  | -0.959261 | 0.812223  |
| H  | -1.033605 | -0.967805 | 0.068328  |
| H  | 0.385871  | -0.988208 | -0.858233 |
| H  | -0.474941 | 1.134148  | -0.699720 |

NH3Et+

|   |           |           |           |
|---|-----------|-----------|-----------|
| C | 1.315237  | -0.141972 | 0.000000  |
| C | 0.000000  | 0.614640  | 0.000000  |
| N | -1.177659 | -0.363150 | 0.000000  |
| H | 2.132763  | 0.583771  | 0.000000  |
| H | 1.429540  | -0.764697 | 0.892820  |
| H | 1.429540  | -0.764697 | -0.892820 |
| H | -1.150840 | -0.971414 | 0.826062  |
| H | -2.080454 | 0.124006  | 0.000000  |
| H | -1.150840 | -0.971414 | -0.826062 |
| H | -0.128757 | 1.235242  | 0.888845  |
| H | -0.128757 | 1.235242  | -0.888845 |

NH3Et+@Ne12

|    |           |           |          |
|----|-----------|-----------|----------|
| Ne | 3.951751  | 0.000000  | 0.000000 |
| Ne | 0.000000  | -3.951751 | 0.000000 |
| Ne | -3.951751 | 0.000000  | 0.000000 |
| Ne | 0.000000  | 3.951751  | 0.000000 |
| Ne | 1.975876  | -1.975876 | 2.794310 |
| Ne | -1.975876 | -1.975876 | 2.794310 |

|    |           |           |           |
|----|-----------|-----------|-----------|
| Ne | -1.975876 | 1.975876  | 2.794310  |
| Ne | 1.975876  | 1.975876  | 2.794310  |
| Ne | 1.975876  | -1.975876 | -2.794310 |
| Ne | -1.975876 | -1.975876 | -2.794310 |
| Ne | -1.975876 | 1.975876  | -2.794310 |
| Ne | 1.975876  | 1.975876  | -2.794310 |
| C  | -0.087442 | 0.079917  | 0.662921  |
| N  | -1.055626 | 1.048631  | -0.011142 |
| H  | -1.597650 | 1.582606  | 0.675682  |
| H  | -0.552898 | 1.718173  | -0.602542 |
| H  | -1.717972 | 0.547247  | -0.611792 |
| C  | 0.691030  | -0.687601 | -0.387337 |
| H  | 1.289467  | -0.021026 | -1.014963 |
| H  | 1.378023  | -1.373805 | 0.112725  |
| H  | 0.031698  | -1.285846 | -1.022763 |
| H  | 0.552892  | 0.690642  | 1.300510  |
| H  | -0.700032 | -0.567843 | 1.291053  |

NH2Me2+

|   |           |           |           |
|---|-----------|-----------|-----------|
| N | 0.000000  | 0.000000  | 0.542423  |
| C | 0.000000  | 1.266413  | -0.276762 |
| H | 0.000000  | 2.121725  | 0.399124  |
| H | 0.894660  | 1.271572  | -0.899018 |
| H | -0.894660 | 1.271572  | -0.899018 |
| C | 0.000000  | -1.266413 | -0.276762 |
| H | 0.894660  | -1.271572 | -0.899018 |
| H | 0.000000  | -2.121725 | 0.399124  |
| H | -0.894660 | -1.271572 | -0.899018 |
| H | 0.817811  | 0.000000  | 1.161006  |
| H | -0.817811 | 0.000000  | 1.161006  |

NH2Me2+@Ne12

|    |           |           |           |
|----|-----------|-----------|-----------|
| Ne | 3.971468  | 0.000000  | 0.000000  |
| Ne | 0.000000  | -3.971468 | 0.000000  |
| Ne | -3.971468 | 0.000000  | 0.000000  |
| Ne | 0.000000  | 3.971468  | 0.000000  |
| Ne | 1.985734  | -1.985734 | 2.808252  |
| Ne | -1.985734 | -1.985734 | 2.808252  |
| Ne | -1.985734 | 1.985734  | 2.808252  |
| Ne | 1.985734  | 1.985734  | 2.808252  |
| Ne | 1.985734  | -1.985734 | -2.808252 |
| Ne | -1.985734 | -1.985734 | -2.808252 |
| Ne | -1.985734 | 1.985734  | -2.808252 |
| Ne | 1.985734  | 1.985734  | -2.808252 |
| N  | 0.049129  | 0.040422  | 0.626239  |
| C  | -0.844077 | 0.915810  | -0.212149 |
| H  | -1.429911 | 1.560199  | 0.440706  |
| H  | -0.212442 | 1.510608  | -0.869744 |
| H  | -1.495949 | 0.269873  | -0.797970 |
| C  | 0.898698  | -0.887883 | -0.200312 |
| H  | 1.522061  | -0.281470 | -0.855037 |
| H  | 1.515029  | -1.494143 | 0.460832  |
| H  | 0.234757  | -1.518516 | -0.789097 |
| H  | 0.653515  | 0.628151  | 1.210526  |
| H  | -0.523424 | -0.508224 | 1.276779  |

NMe4+

|   |           |           |           |
|---|-----------|-----------|-----------|
| N | 0.000000  | 0.000000  | 0.000000  |
| C | 0.870441  | 0.870441  | 0.870441  |
| H | 0.231575  | 1.494862  | 1.494862  |
| H | 1.494862  | 0.231575  | 1.494862  |
| H | 1.494862  | 1.494862  | 0.231575  |
| C | -0.870441 | -0.870441 | 0.870441  |
| H | -1.494862 | -0.231575 | 1.494862  |
| H | -1.494862 | -1.494862 | 0.231575  |
| H | -0.231575 | -1.494862 | 1.494862  |
| C | 0.870441  | -0.870441 | -0.870441 |
| H | 0.231575  | -1.494862 | -1.494862 |
| H | 1.494862  | -0.231575 | -1.494862 |
| H | 1.494862  | -1.494862 | -0.231575 |
| C | -0.870441 | 0.870441  | -0.870441 |
| H | -0.231575 | 1.494862  | -1.494862 |
| H | -1.494862 | 0.231575  | -1.494862 |
| H | -1.494862 | 1.494862  | -0.231575 |

NMe4+@Ne12

|    |          |          |          |
|----|----------|----------|----------|
| Ne | 4.402983 | 0.000000 | 0.000000 |
|----|----------|----------|----------|

|    |           |           |           |
|----|-----------|-----------|-----------|
| Ne | 0.000000  | -4.402983 | 0.000000  |
| Ne | -4.402983 | 0.000000  | 0.000000  |
| Ne | 0.000000  | 4.402983  | 0.000000  |
| Ne | 2.201491  | -2.201491 | 3.113379  |
| Ne | -2.201491 | -2.201491 | 3.113379  |
| Ne | -2.201491 | 2.201491  | 3.113379  |
| Ne | 2.201491  | 2.201491  | 3.113379  |
| Ne | 2.201491  | -2.201491 | -3.113379 |
| Ne | -2.201491 | -2.201491 | -3.113379 |
| Ne | -2.201491 | 2.201491  | -3.113379 |
| Ne | 2.201491  | 2.201491  | -3.113379 |
| N  | 0.000036  | -0.000508 | 0.000270  |
| C  | 0.867434  | 0.866333  | 0.872218  |
| H  | 0.226097  | 1.488280  | 1.495723  |
| H  | 1.489252  | 0.224539  | 1.495409  |
| H  | 1.493976  | 1.492723  | 0.237368  |
| C  | -0.868386 | -0.868922 | 0.869611  |
| H  | -1.491385 | -0.228276 | 1.492770  |
| H  | -1.493708 | -1.494638 | 0.232918  |
| H  | -0.227765 | -1.491524 | 1.493189  |
| C  | 0.868191  | -0.867663 | -0.870601 |
| H  | 0.227364  | -1.489422 | -1.494817 |
| H  | 1.490984  | -0.226154 | -1.493091 |
| H  | 1.493731  | -1.494239 | -0.234971 |
| C  | -0.867086 | 0.868152  | -0.870115 |
| H  | -0.225541 | 1.490627  | -1.492877 |
| H  | -1.489479 | 0.227691  | -1.494081 |
| H  | -1.493071 | 1.493995  | -0.234189 |

ImH+

|   |          |           |           |
|---|----------|-----------|-----------|
| C | 0.000000 | 0.000000  | 1.143576  |
| H | 0.000000 | 0.000000  | 2.223237  |
| N | 0.000000 | 1.074578  | 0.348605  |
| N | 0.000000 | -1.074578 | 0.348605  |
| C | 0.000000 | 0.681873  | -0.978521 |
| C | 0.000000 | -0.681873 | -0.978521 |
| H | 0.000000 | 2.033122  | 0.680122  |
| H | 0.000000 | -2.033122 | 0.680122  |
| H | 0.000000 | 1.390839  | -1.791575 |
| H | 0.000000 | -1.390839 | -1.791575 |

ImH+@Ne12

|    |           |           |           |
|----|-----------|-----------|-----------|
| Ne | 4.063937  | 0.000000  | 0.000000  |
| Ne | 0.000000  | -4.063937 | 0.000000  |
| Ne | -4.063937 | 0.000000  | 0.000000  |
| Ne | 0.000000  | 4.063937  | 0.000000  |
| Ne | 2.031968  | -2.031968 | 2.873637  |
| Ne | -2.031968 | -2.031968 | 2.873637  |
| Ne | -2.031968 | 2.031968  | 2.873637  |
| Ne | 2.031968  | 2.031968  | 2.873637  |
| Ne | 2.031968  | -2.031968 | -2.873637 |
| Ne | -2.031968 | -2.031968 | -2.873637 |
| Ne | -2.031968 | 2.031968  | -2.873637 |
| Ne | 2.031968  | 2.031968  | -2.873637 |
| C  | -0.000042 | 0.000711  | 1.459124  |
| H  | -0.000282 | 0.000490  | 2.537474  |
| N  | 0.000077  | 1.074437  | 0.664549  |
| N  | 0.000204  | -1.072733 | 0.664121  |
| C  | 0.000394  | 0.682943  | -0.662601 |
| C  | 0.000478  | -0.680714 | -0.662861 |
| H  | -0.000037 | 2.032849  | 0.993578  |
| H  | 0.000195  | -2.031261 | 0.992808  |
| H  | 0.000568  | 1.392068  | -1.473297 |
| H  | 0.000681  | -1.389506 | -1.473859 |

C (NH2) 3+

|   |           |           |           |
|---|-----------|-----------|-----------|
| C | 0.000000  | 0.000000  | 0.000000  |
| N | 0.000000  | 1.336715  | 0.000000  |
| N | 1.157629  | -0.668358 | 0.000000  |
| N | -1.157629 | -0.668358 | 0.000000  |
| H | 0.839925  | 1.862743  | 0.195204  |
| H | 1.193221  | -1.658768 | 0.195204  |
| H | -2.033145 | -0.203976 | 0.195204  |
| H | -0.839925 | 1.862743  | -0.195204 |
| H | 2.033145  | -0.203976 | -0.195204 |
| H | -1.193221 | -1.658768 | -0.195204 |

C (NH2) 3+@Ne12

|    |           |           |           |
|----|-----------|-----------|-----------|
| Ne | 4.052186  | 0.000000  | 0.000000  |
| Ne | 0.000000  | -4.052186 | 0.000000  |
| Ne | -4.052186 | 0.000000  | 0.000000  |
| Ne | 0.000000  | 4.052186  | 0.000000  |
| Ne | 2.026093  | -2.026093 | 2.865328  |
| Ne | -2.026093 | -2.026093 | 2.865328  |
| Ne | -2.026093 | 2.026093  | 2.865328  |
| Ne | 2.026093  | 2.026093  | 2.865328  |
| Ne | 2.026093  | -2.026093 | -2.865328 |
| Ne | -2.026093 | -2.026093 | -2.865328 |
| Ne | -2.026093 | 2.026093  | -2.865328 |
| Ne | 2.026093  | 2.026093  | -2.865328 |
| C  | 0.025676  | -0.326983 | 0.057648  |
| N  | 0.0065167 | 1.005610  | 0.160089  |
| N  | 1.161023  | -1.028231 | 0.022569  |
| N  | -1.149475 | -0.956902 | -0.011108 |
| H  | 0.916875  | 1.488813  | 0.406405  |
| H  | 1.157645  | -2.032965 | 0.117478  |
| H  | -2.015252 | -0.480012 | 0.191487  |
| H  | -0.758425 | 1.569597  | 0.008995  |
| H  | 2.053838  | -0.577404 | -0.110409 |
| H  | -1.205577 | -1.933383 | -0.260086 |

TzH+

|   |           |           |          |
|---|-----------|-----------|----------|
| C | 1.079126  | 0.331603  | 0.000000 |
| H | 2.112004  | 0.650347  | 0.000000 |
| N | 0.000000  | 1.101013  | 0.000000 |
| N | 0.617538  | -0.927637 | 0.000000 |
| C | -0.759447 | -0.861305 | 0.000000 |
| H | -0.040684 | 2.116263  | 0.000000 |
| H | 1.187204  | -1.768547 | 0.000000 |
| H | -1.411198 | -1.722792 | 0.000000 |
| N | -1.155452 | 0.384187  | 0.000000 |

TzH+@Ne12

|    |           |           |           |
|----|-----------|-----------|-----------|
| Ne | 4.027922  | 0.000000  | 0.000000  |
| Ne | 0.000000  | -4.027922 | 0.000000  |
| Ne | -4.027922 | 0.000000  | 0.000000  |
| Ne | 0.000000  | 4.027922  | 0.000000  |
| Ne | 2.013961  | -2.013961 | 2.848171  |
| Ne | -2.013961 | -2.013961 | 2.848171  |
| Ne | -2.013961 | 2.013961  | 2.848171  |
| Ne | 2.013961  | 2.013961  | 2.848171  |
| Ne | 2.013961  | -2.013961 | -2.848171 |
| Ne | -2.013961 | -2.013961 | -2.848171 |
| Ne | -2.013961 | 2.013961  | -2.848171 |
| Ne | 2.013961  | 2.013961  | -2.848171 |
| C  | -0.908905 | -0.042791 | 0.691265  |
| H  | -1.906215 | -0.130199 | 1.093636  |
| N  | -0.123674 | -1.021756 | 0.268706  |
| N  | -0.203905 | 1.082664  | 0.512220  |
| C  | 1.013323  | 0.724201  | -0.022707 |
| H  | -0.320510 | -2.018283 | 0.252628  |
| H  | -0.516048 | 2.022103  | 0.735654  |
| H  | 1.796686  | 1.423565  | -0.271219 |
| N  | 1.078684  | -0.571808 | -0.179513 |
